# Supplementary material for: Multiplatform Urinary Metabolomics Profiling to Discriminate Cachectic from Non-Cachectic Colorectal Cancer Patients: Pilot Results from the ColoCare Study
Source: MDPI journal article supplement (doi:10.3390/metabo9090178), 2019-09-06
Supplement: s1 [file s1]

**Supplementary Table S1. Spearman correlations for metabolites overlapping across GC-MS and <sup>1</sup>H-NMR.\***

|                              | N  | Correlation Coefficient | pValue       |
|------------------------------|----|-------------------------|--------------|
| Hippurate                    | 37 | 0.51                    | <b>0.001</b> |
| Alanine                      | 37 | 0.48                    | <b>0.002</b> |
| Hypoxanthine                 | 37 | 0.46                    | <b>0.004</b> |
| Valine                       | 37 | 0.43                    | <b>0.008</b> |
| 4-Hydroxyphenylacetate       | 34 | 0.41                    | <b>0.02</b>  |
| Citrate                      | 37 | 0.39                    | <b>0.02</b>  |
| Homovanillate                | 36 | 0.36                    | <b>0.03</b>  |
| myo-Inositol                 | 36 | 0.36                    | <b>0.03</b>  |
| 3-Hydroxyisobutyrate         | 37 | 0.35                    | <b>0.03</b>  |
| Indole-3-acetate             | 36 | 0.34                    | <b>0.04</b>  |
| Threonine                    | 37 | 0.30                    | 0.07         |
| Xanthurenate                 | 26 | -0.34                   | 0.08         |
| 4-Hydroxy-3-methoxymandelate | 29 | -0.32                   | 0.08         |
| Arabinose                    | 37 | 0.28                    | 0.09         |
| 2-Hydroxyphenylacetate       | 20 | 0.37                    | 0.10         |
| Mannitol                     | 37 | 0.23                    | 0.17         |
| Glutamine                    | 37 | 0.20                    | 0.23         |
| Tyrosine                     | 37 | 0.16                    | 0.34         |
| Histidine                    | 37 | 0.12                    | 0.46         |
| N-Acetylglucosamine          | 44 | -0.10                   | 0.47         |
| Glutamate                    | 36 | 0.11                    | 0.53         |
| Glucose                      | 37 | -0.10                   | 0.53         |
| Glycolate                    | 37 | -0.09                   | 0.56         |
| Tartrate                     | 37 | 0.07                    | 0.65         |
| 3-Aminoisobutyrate           | 36 | 0.14                    | 0.69         |
| Pyroglutamate                | 37 | -0.13                   | 0.73         |
| Asparagine                   | 37 | -0.06                   | 0.74         |
| 5-Hydroxyindole-3-acetate    | 31 | 0.03                    | 0.87         |
| Gluconate                    | 37 | -0.03                   | 0.87         |
| Lactate                      | 37 | -0.01                   | 0.95         |
| Fructose                     | 36 | -0.01                   | 0.97         |
| 2-Hydroxyglutarate           | 3  | NA                      |              |
| 2-Phosphoglycerate           | 3  | NA                      |              |
| Lysine                       | 1  | NA                      |              |

\*significant pValues are bold
