# Supplementary material for: Multiplatform Urinary Metabolomics Profiling to Discriminate Cachectic from Non-Cachectic Colorectal Cancer Patients: Pilot Results from the ColoCare Study
Source: MDPI journal article supplement (doi:10.3390/metabo9090178), 2019-09-06
Supplement: s1 [file s1]

**Supplementary Table S2. Comparison of metabolite levels across cachectic, pre-cachectic and non-cachectic patients by tumor stage. One-way anova was used to assess the p for difference across the three groups.**

|                                               | Tumor Stage | Cachectic   | Pre-cachectic | Non-cachectic | pvalue |
|-----------------------------------------------|-------------|-------------|---------------|---------------|--------|
| <b>2-O-Glycerol-alpha-d-galactopyranoside</b> | Stage I     | 0.1 ± 1.29  | -0.3 ± 0.92   | 0.6 ± 0.50    | 0.97   |
|                                               | Stage II    | -0.1 ± 0.00 | -0.6 ± 0.79   | 0.6 ± 0.60    | 0.49   |
|                                               | Stage III   | 0.2 ± 0.82  | -0.3 ± 1.86   | 0.5 ± 0.19    | 0.30   |
|                                               | Stage IV    | -0.3 ± 1.07 | -0.1 ± 0.07   | NA            | 0.28   |
| <b>p-cresol-glucuronide</b>                   | Stage I     | 0.2 ± 1.28  | 0.8 ± 0.22    | 0.3 ± 0.64    | 0.30   |
|                                               | Stage II    | 0.1 ± 0.00  | -0.5 ± 0.89   | 0.8 ± 0.77    | 0.31   |
|                                               | Stage III   | 0.1 ± 0.88  | 0.1 ± 0.30    | 0.5 ± 0.63    | 0.77   |
|                                               | Stage IV    | 0.2 ± 0.71  | -2.0 ± 2.48   | NA            | 0.63   |
| <b>Unknown Glucuronide 27.116min</b>          | Stage I     | 1.6 ± 1.76  | 0.4 ± 0.21    | 0.3 ± 0.90    | 0.67   |
|                                               | Stage II    | 0.3 ± 0.00  | -0.4 ± 0.97   | 0.7 ± 0.50    | 0.13   |
|                                               | Stage III   | 0.2 ± 0.58  | 0.5 ± 0.80    | 1.4 ± 0.41    | 0.45   |
|                                               | Stage IV    | 0.5 ± 0.79  | -0.4 ± 0.02   | NA            | 0.54   |
| <b>Unknown Glucuronide 27.688min</b>          | Stage I     | 0.6 ± 1.15  | 0.5 ± 0.01    | 0.6 ± 0.62    | 0.09   |
|                                               | Stage II    | 0.1 ± 0.00  | -0.3 ± 1.21   | 1.0 ± 0.81    | 0.69   |
|                                               | Stage III   | 0.2 ± 0.78  | 0.4 ± 0.48    | 0.6 ± 1.01    | 0.75   |
|                                               | Stage IV    | 1.2 ± 1.25  | 0.5 ± 0.87    | NA            | 0.39   |
| <b>Unknown Glucuronide 28.543min</b>          | Stage I     | 0.6 ± 0.61  | 0.1 ± 0.06    | 0.6 ± 0.67    | 0.97   |
|                                               | Stage II    | -0.8 ± 0.00 | -0.6 ± 1.04   | 1.0 ± 1.22    | 0.64   |
|                                               | Stage III   | 0.0 ± 0.60  | 0.4 ± 0.25    | 1.4 ± 0.83    | 0.21   |
|                                               | Stage IV    | 0.6 ± 0.47  | 1.2 ± 0.56    | NA            | 0.84   |
| <b>Unknown 28.636min</b>                      | Stage I     | 0.9 ± 1.14  | -0.1 ± 0.71   | 1.6 ± 0.46    | 0.07   |
|                                               | Stage II    | 0.3 ± 0.00  | -0.6 ± 0.69   | 0.8 ± 1.16    | 0.32   |
|                                               | Stage III   | 0.3 ± 0.30  | 0.2 ± 1.04    | 1.0 ± 0.63    | 0.22   |
|                                               | Stage IV    | 0.9 ± 0.64  | 1.7 ± 1.55    | NA            | 0.42   |
| <b>2,3-Dihydroxybutyrate</b>                  | Stage I     | 0.1 ± 0.60  | -0.5 ± 1.07   | -0.4 ± 0.55   | 0.03   |
|                                               | Stage II    | 0.8 ± 0.00  | 0.4 ± 1.40    | -0.6 ± 0.64   | 0.92   |
|                                               | Stage III   | 0.2 ± 0.75  | -0.3 ± 1.09   | -0.1 ± 0.18   | 0.63   |
|                                               | Stage IV    | -0.1 ± 0.31 | -0.3 ± 0.37   | NA            | 0.05   |

|                                |           |             |              |              |       |
|--------------------------------|-----------|-------------|--------------|--------------|-------|
| Unknown Glucuronide 29.801min  | Stage I   | 0.9 ± 1.02  | 0.3 ± 0.93   | 0.8 ± 1.20   | 0.36  |
|                                | Stage II  | 0.4 ± 0.00  | -0.4 ± 1.26  | 0.7 ± 0.99   | 0.30  |
|                                | Stage III | 0.4 ± 0.49  | -0.1 ± 1.11  | 1.1 ± 0.01   | 0.12  |
|                                | Stage IV  | 1.1 ± 0.96  | 0.6 ± 0.83   | NA           | 0.06  |
| Unknown Dissacharide 29.943min | Stage I   | 1.1 ± 0.56  | -0.2 ± 0.85  | -0.6 ± 1.37  | 0.26  |
|                                | Stage II  | 0.9 ± 0.00  | -0.4 ± 0.95  | 0.2 ± 0.99   | 0.02  |
|                                | Stage III | 0.0 ± 0.72  | -0.4 ± 1.73  | 1.3 ± 1.35   | 0.57  |
|                                | Stage IV  | 0.4 ± 0.63  | 0.6 ± 0.19   | NA           | 0.22  |
| Arginine                       | Stage I   | 28.4 ± 6.54 | 24.8 ± 13.17 | 15.0 ± 13.84 | 0.74  |
|                                | Stage II  | 37.9 ± 0.00 | 27.9 ± 6.99  | 21.8 ± 4.24  | 0.40  |
|                                | Stage III | 22.9 ± 5.52 | 27.5 ± 19.53 | 19.7 ± 6.21  | 0.70  |
|                                | Stage IV  | 23.9 ± 5.64 | 37.3 ± 4.70  | NA           | 0.13  |
| Isobutyrate                    | Stage I   | 1.1 ± 1.54  | 3.6 ± 0.49   | 1.4 ± 1.88   | 0.13  |
|                                | Stage II  | 0.8 ± 0.00  | 1.4 ± 1.12   | 0.7 ± 0.47   | 0.004 |
|                                | Stage III | 0.7 ± 0.22  | 1.5 ± 0.78   | 2.1 ± 0.58   | 0.02  |
|                                | Stage IV  | 0.7 ± 0.29  | 0.9 ± 1.21   | NA           | 0.12  |
| Methionine                     | Stage I   | 6.8 ± 6.52  | 3.0 ± 2.54   | 1.9 ± 1.24   | 0.05  |
|                                | Stage II  | 2.8 ± 0.00  | 3.4 ± 0.73   | 2.8 ± 1.47   | 0.08  |
|                                | Stage III | 2.5 ± 0.73  | 4.8 ± 2.66   | 1.7 ± 1.82   | 0.11  |
|                                | Stage IV  | 3.2 ± 1.18  | 7.4 ± 4.43   | NA           | 0.15  |
| 2,3-Butanediol                 | Stage I   | 0.5 ± 1.02  | 0.5 ± 1.07   | 0.6 ± 0.80   | 0.11  |
|                                | Stage II  | 0.1 ± 0.00  | -0.4 ± 0.96  | 0.9 ± 0.50   | 0.11  |
|                                | Stage III | 0.2 ± 0.74  | 0.1 ± 1.49   | 1.9 ± 0.68   | 0.32  |
|                                | Stage IV  | 0.0 ± 0.62  | 0.9 ± 2.93   | NA           | 0.37  |
| 3-Phenylpropionate             | Stage I   | 11.9 ± 3.91 | 6.3 ± 0.18   | 16.3 ± 1.96  | 0.07  |
|                                | Stage II  | 12.0 ± 0.00 | 9.8 ± 3.82   | 13.4 ± 8.78  | 0.45  |
|                                | Stage III | 9.7 ± 6.90  | 10.1 ± 5.53  | 12.7 ± 0.00  | 0.66  |
|                                | Stage IV  | 10.2 ± 6.13 | 8.4 ± 0.00   | NA           | 0.76  |
| Cholate                        | Stage I   | 1.4 ± 1.32  | NA           | 1.5 ± 0.24   |       |
|                                | Stage II  | NA          | 0.7 ± 0.00   | 1.8 ± 0.00   | 0.70  |
|                                | Stage III | 2.1 ± 2.54  | NA           | NA           | 0.51  |

|                   |           |                |               |                |       |
|-------------------|-----------|----------------|---------------|----------------|-------|
| Ethyleneglycol    | Stage IV  | 1.6 ± 0.00     | 0.9 ± 0.00    | NA             | 0.13  |
|                   | Stage I   | 7.3 ± 4.39     | 12.1 ± 4.09   | 9.6 ± 7.56     | 0.18  |
|                   | Stage II  | 9.0 ± 0.00     | 12.3 ± 7.12   | 16.1 ± 9.37    | 0.01  |
|                   | Stage III | 11.1 ± 4.54    | 24.8 ± 11.81  | 13.7 ± 8.16    | 0.14  |
| Hydroquinone      | Stage IV  | 8.5 ± 3.47     | 11.8 ± 0.44   | NA             | 0.65  |
|                   | Stage I   | 0.8 ± 0.64     | 0.5 ± 0.16    | -0.4 ± 1.69    | 0.07  |
|                   | Stage II  | -0.2 ± 0.00    | -1.1 ± 1.23   | 0.9 ± 0.54     | 0.09  |
|                   | Stage III | 0.8 ± 0.26     | -0.4 ± 1.43   | 1.5 ± 0.34     | 0.118 |
| 3-Methylxanthine  | Stage IV  | 0.4 ± 0.37     | -0.3 ± 0.95   | NA             | 0.014 |
|                   | Stage I   | 1.4 ± 0.58     | 5.0 ± 2.93    | 5.3 ± 1.17     | 0.08  |
|                   | Stage II  | 1.3 ± 0.00     | 5.8 ± 4.09    | 6.6 ± 3.90     | 0.38  |
|                   | Stage III | 4.1 ± 1.66     | 1.8 ± 0.99    | 4.4 ± 1.71     | 0.09  |
| Acetone           | Stage IV  | 4.1 ± 1.53     | 2.9 ± 0.16    | NA             | 0.03  |
|                   | Stage I   | 8.7 ± 9.54     | 2.7 ± 1.41    | 1.1 ± 0.69     | 0.48  |
|                   | Stage II  | 6.9 ± 0.00     | 3.4 ± 2.65    | 2.0 ± 0.99     | 0.49  |
|                   | Stage III | 5.9 ± 4.06     | 2.6 ± 1.12    | 2.2 ± 1.49     | 0.59  |
| Aminomalonate     | Stage IV  | 6.9 ± 10.80    | 4.7 ± 0.59    | NA             | 0.72  |
|                   | Stage I   | 0.4 ± 0.52     | 0.1 ± 0.48    | -0.7 ± 1.39    | 0.83  |
|                   | Stage II  | 0.5 ± 0.00     | -0.1 ± 0.18   | 0.0 ± 0.64     | 0.14  |
|                   | Stage III | 0.4 ± 0.77     | -0.8 ± 0.98   | 0.6 ± 0.37     | 0.83  |
| Glycine           | Stage IV  | 0.3 ± 0.60     | -0.1 ± 1.60   | NA             | 0.04  |
|                   | Stage I   | 84.7 ± 20.05   | 48.7 ± 27.73  | 51.9 ± 40.18   | 0.41  |
|                   | Stage II  | 268.0 ± 0.00   | 67.3 ± 23.50  | 124.7 ± 126.98 | 0.19  |
|                   | Stage III | 183.8 ± 165.65 | 63.3 ± 25.83  | 172.1 ± 148.66 | 0.3   |
| Uracil            | Stage IV  | 144.1 ± 107.67 | 127.7 ± 97.47 | NA             | 0.76  |
|                   | Stage I   | 5.6 ± 2.09     | 8.6 ± 0.92    | 3.5 ± 2.80     | 0.03  |
|                   | Stage II  | 9.2 ± 0.00     | 6.1 ± 1.48    | 3.7 ± 1.35     | 0.13  |
|                   | Stage III | 6.2 ± 3.27     | 4.8 ± 1.42    | 4.9 ± 3.96     | 0.91  |
| Unknown 13.271min | Stage IV  | 2.5 ± 0.99     | 8.9 ± 2.16    | NA             |       |
|                   | Stage I   | -0.3 ± 0.61    | 0.4 ± 1.48    | 0.8 ± 1.15     | 0.10  |
|                   | Stage II  | 0.7 ± 0.00     | 0.8 ± 0.96    | -0.1 ± 0.72    | 0.14  |

|                                      |           |             |             |             |       |
|--------------------------------------|-----------|-------------|-------------|-------------|-------|
|                                      | Stage III | -0.1 ± 0.96 | 1.1 ± 0.52  | 0.7 ± 0.55  | 0.22  |
|                                      | Stage IV  | 0.2 ± 1.15  | 0.8 ± 0.63  | NA          | 0.39  |
| <b>4-Hydroxyphenylacetate</b>        | Stage I   | 0.3 ± 0.64  | 0.5 ± 0.61  | -0.3 ± 0.37 | 0.73  |
|                                      | Stage II  | 0.3 ± 0.00  | 0.1 ± 1.52  | 0.8 ± 1.12  | 0.52  |
|                                      | Stage III | -0.4 ± 0.59 | 0.8 ± 0.64  | 1.1 ± 0.46  | 0.56  |
|                                      | Stage IV  | -0.6 ± 0.64 | 0.0 ± 1.67  | NA          | 0.20  |
| <b>Tartrate</b>                      | Stage I   | 1.2 ± 1.70  | 0.3 ± 0.07  | 1.2 ± 1.13  | 0.61  |
|                                      | Stage II  | 0.2 ± 0.00  | -0.2 ± 1.10 | 0.7 ± 0.83  | 0.53  |
|                                      | Stage III | 0.0 ± 0.51  | 0.1 ± 0.99  | 1.9 ± 1.77  | 0.53  |
|                                      | Stage IV  | -0.2 ± 0.28 | -0.1 ± 0.76 | NA          | 0.91  |
| <b>Sugar 14.052min</b>               | Stage I   | 0.3 ± 1.87  | -0.7 ± 0.33 | 0.6 ± 0.36  | 0.09  |
|                                      | Stage II  | -0.2 ± 0.00 | 0.0 ± 0.59  | 0.5 ± 1.34  | 0.001 |
|                                      | Stage III | -0.2 ± 0.64 | -0.2 ± 2.28 | 1.4 ± 0.15  | 0.68  |
|                                      | Stage IV  | 0.6 ± 0.87  | -1.4 ± 1.25 | NA          | 0.53  |
| <b>Unknown Sugar 14.575min</b>       | Stage I   | 0.2 ± 0.35  | -0.2 ± 0.32 | -0.7 ± 2.35 | 0.70  |
|                                      | Stage II  | -2.2 ± 0.00 | 0.3 ± 1.22  | -0.1 ± 0.78 | 0.74  |
|                                      | Stage III | 0.9 ± 0.83  | -0.9 ± 1.55 | -0.2 ± 0.07 | 0.84  |
|                                      | Stage IV  | 0.8 ± 0.21  | -1.2 ± 0.34 | NA          | 0.13  |
| <b>Sugar Acid 15.429min</b>          | Stage I   | 1.2 ± 0.86  | -0.1 ± 0.18 | 0.7 ± 0.18  | 0.22  |
|                                      | Stage II  | -0.6 ± 0.00 | -0.4 ± 0.66 | 0.4 ± 0.67  | 0.51  |
|                                      | Stage III | 0.5 ± 0.38  | 0.3 ± 0.23  | 1.8 ± 1.44  | 0.27  |
|                                      | Stage IV  | 0.2 ± 0.42  | 0.0 ± 0.88  | NA          | 0.39  |
| <b>Sugar Acid 15.750min</b>          | Stage I   | 0.9 ± 0.68  | -0.1 ± 1.64 | 0.7 ± 0.94  | 0.58  |
|                                      | Stage II  | -1.0 ± 0.00 | -0.8 ± 0.57 | 0.8 ± 0.62  | 0.77  |
|                                      | Stage III | 0.8 ± 0.68  | 0.1 ± 1.24  | 0.7 ± 0.05  | 0.05  |
|                                      | Stage IV  | 0.4 ± 0.74  | 1.0 ± 1.52  | NA          | 0.68  |
| <b>Sugar 15.798min</b>               | Stage I   | 0.8 ± 1.32  | 0.4 ± 0.91  | 1.7 ± 1.62  | 0.11  |
|                                      | Stage II  | -1.1 ± 0.00 | -0.6 ± 1.04 | 0.9 ± 0.45  | 0.83  |
|                                      | Stage III | 0.3 ± 0.62  | 0.4 ± 0.75  | 0.9 ± 0.51  |       |
|                                      | Stage IV  | 0.0 ± 1.07  | 0.5 ± 1.83  | NA          | 0.28  |
| <b>4-Hydroxy-3-Methoxy-Mandelate</b> | Stage I   | 0.8 ± 0.91  | -0.1 ± 0.21 | -0.6 ± 0.50 | 0.33  |

|           |                 |                 |                 |       |
|-----------|-----------------|-----------------|-----------------|-------|
| Stage II  | $-0.6 \pm 0.00$ | $-0.6 \pm 0.50$ | $0.3 \pm 0.75$  | 0.79  |
| Stage III | $0.6 \pm 1.67$  | $-0.4 \pm 1.34$ | $-0.1 \pm 1.19$ | 0.86  |
| Stage IV  | $0.5 \pm 0.60$  | $0.3 \pm 0.80$  | NA              | 0.006 |

---
